# Supplementary material for: Transcriptome Analysis of the Immune Process of Golden Pompano (Trachinotus ovatus) Infected with Streptococcus agalactiae
Source: MDPI journal article supplement (doi:10.3390/fishes8010052), 2023-01-13
Supplement: s1 [file s1]

# Supplementary Materials: Transcriptome Analysis of the Immune Process of Golden Pompano (*Trachinotus ovatus*) Infected with *Streptococcus agalactiae*

Jie Gao <sup>1,2,†</sup>, Hua-Yang Guo <sup>1,3,†</sup>, Ming-Jian Liu <sup>1</sup>, Ke-Cheng Zhu <sup>1,3</sup>, Bo Liu <sup>1,3</sup>, Bao-Suo Liu <sup>1,3</sup>, Nan Zhang <sup>1,3</sup>, Shi-Gui Jiang <sup>1,3,4</sup> and Dian-Chang Zhang <sup>1,3,4,\*</sup>

<sup>1</sup> Key Laboratory of South China Sea Fishery Resources Exploitation and Utilization, Ministry of Agriculture and Rural Affairs, South China Sea Fisheries Research Institute, Chinese Academy of Fishery Sciences, Guangzhou 510300, China

<sup>2</sup> Ocean College, Hebei Agricultural University, Qinhuangdao 066000, China

<sup>3</sup> Guangdong Provincial Engineer Technology Research Center of Marine Biological Seed Industry, Guangzhou 510300, China

<sup>4</sup> Sanya Tropical Fisheries Research Institute, Sanya 572019, China

\* Correspondence: zhangdch@scsfri.ac.cn

† These two authors contribute equally to this work.



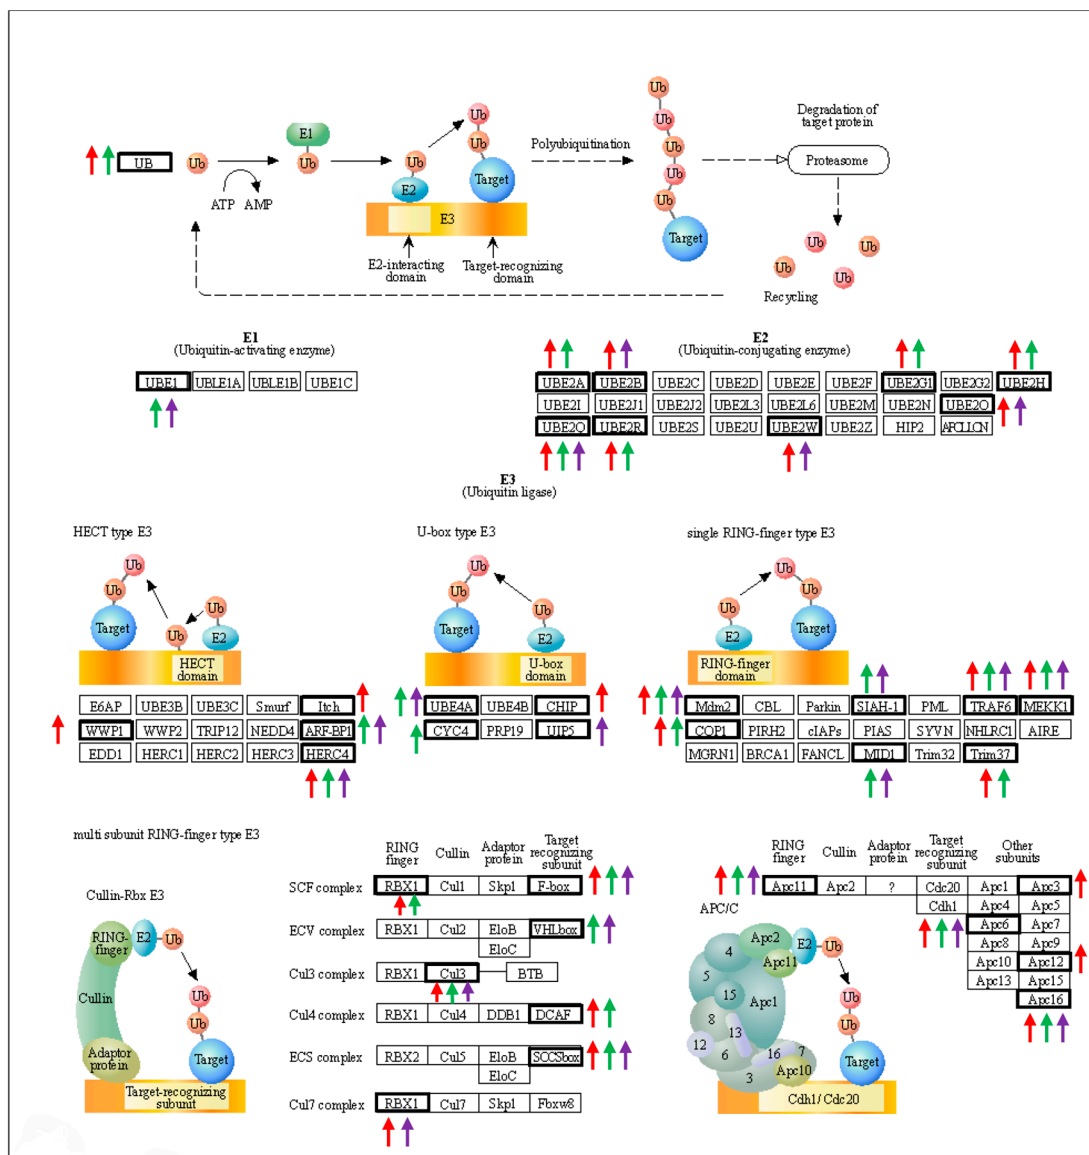

**Figure S2.** The Changes of hepatic ubiquitin-mediated proteolysis at 96 h of infection. Red, green and purple arrows indicate genes increased in liver, spleen and head kidney, respectively.

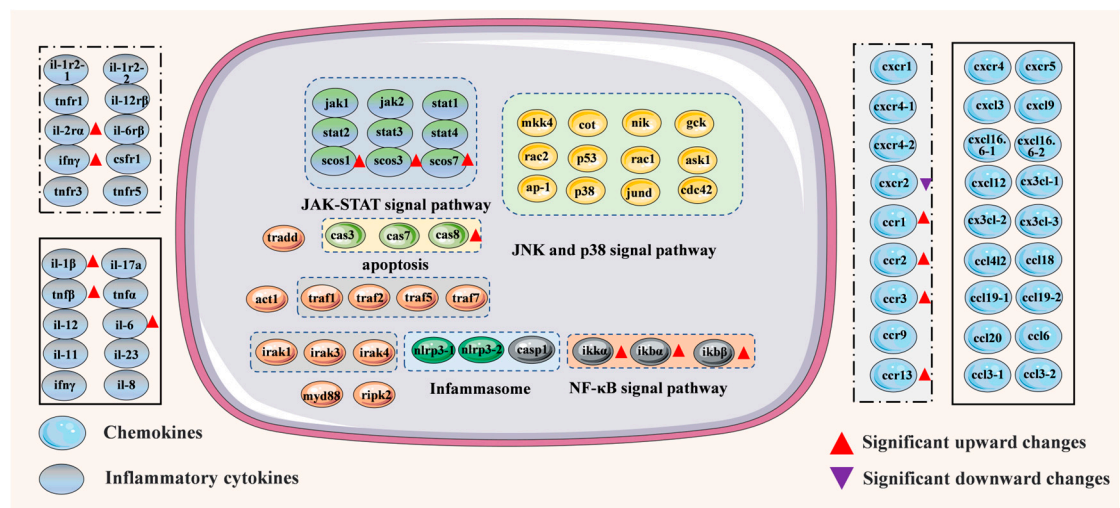

**Figure S3.** Illustrated overview of the inflammatory response in the golden pompano.

96 h

**Head  
kidney**

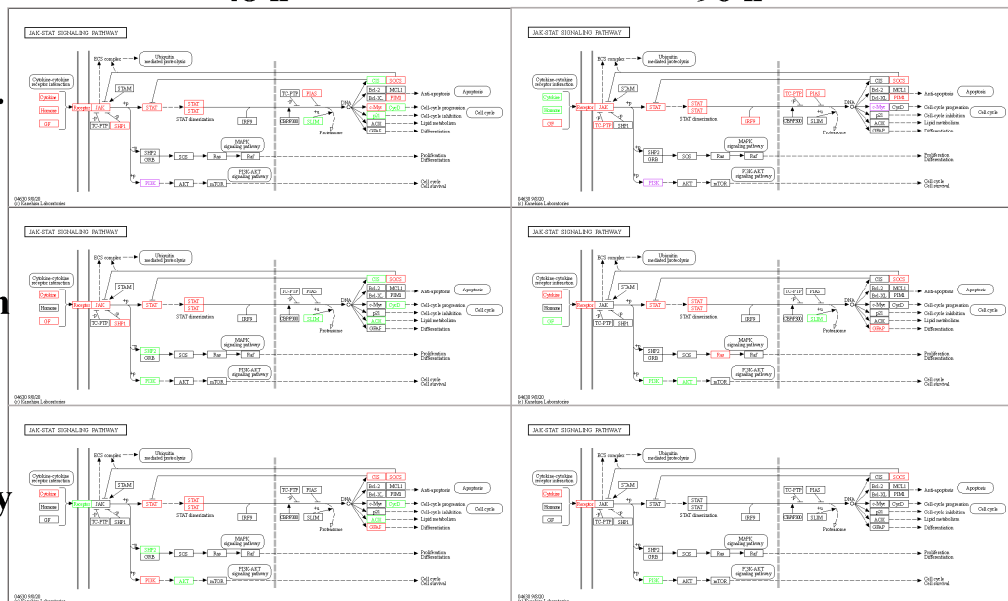

**Figure S4.** Changes in JAK-STAT signaling pathway at different time points after infection. Red boxes indicate genes with increased expression; Green boxes indicate genes with reduced expression; Purple boxes indicate genes whose expression is uncertain.

**Table S1.** Disembarkation data.

| <b>Sample</b> | <b>Reads No.</b> | <b>Bases (bp)</b> | <b>Q30 (bp)</b> | <b>N (%)</b> | <b>Q20 (%)</b> | <b>Q30 (%)</b> |
|---------------|------------------|-------------------|-----------------|--------------|----------------|----------------|
| L_0h_1        | 39676608         | 5951491200        | 5607981841      | 0.001981     | 97.8           | 94.22          |
| L_0h_2        | 41292022         | 6193803300        | 5853270194      | 0.00198      | 97.92          | 94.5           |
| L_0h_3        | 42934994         | 6440249100        | 6101225698      | 0.000419     | 98.12          | 94.73          |
| L_48h_1       | 41360092         | 6204013800        | 5856722232      | 0.001994     | 97.86          | 94.4           |
| L_48h_2       | 48428598         | 7264289700        | 6857823411      | 0.002054     | 97.85          | 94.4           |
| L_48h_3       | 53730328         | 8059549200        | 7648608671      | 0.000422     | 98.07          | 94.9           |
| L_120h_1      | 43540034         | 6531005100        | 6170911247      | 0.002054     | 97.89          | 94.48          |
| L_120h_2      | 46592402         | 6988860300        | 6597987025      | 0.001981     | 97.86          | 94.4           |
| L_120h_3      | 52789260         | 7918389000        | 7492303157      | 0.00076      | 98.06          | 94.61          |
| S_0h_1        | 47685276         | 7152791400        | 6734254870      | 0.002025     | 97.71          | 94.14          |
| S_0h_2        | 45760068         | 6864010200        | 6454451025      | 0.001988     | 97.64          | 94.03          |
| S_0h_3        | 48411046         | 7261656900        | 6830617546      | 0.000418     | 97.76          | 94.06          |
| S_48h_1       | 41081800         | 6162270000        | 5799023198      | 0.001983     | 97.71          | 94.1           |
| S_48h_2       | 47026060         | 7053909000        | 6645418380      | 0.001967     | 97.73          | 94.2           |
| S_48h_3       | 47386166         | 7107924900        | 6707249476      | 0.000752     | 97.86          | 94.36          |
| S_120h_1      | 38767690         | 5815153500        | 5462583776      | 0.001977     | 97.58          | 93.93          |
| S_120h_2      | 44228828         | 6634324200        | 6220086399      | 0.001988     | 97.5           | 93.75          |
| S_120h_3      | 44661820         | 6699273000        | 6304585232      | 0.000753     | 97.73          | 94.1           |
| K_0h_1        | 40243318         | 6036497700        | 5657818109      | 0.001994     | 97.51          | 93.72          |
| K_0h_2        | 44653136         | 6697970400        | 6286477924      | 0.001917     | 97.58          | 93.85          |
| K_0h_3        | 42451546         | 6367731900        | 6003742574      | 0.000756     | 97.83          | 94.28          |
| K_48h_1       | 40374500         | 6056175000        | 5704413388      | 0.001996     | 97.71          | 94.19          |
| K_48h_2       | 43262788         | 6489418200        | 6109281693      | 0.002009     | 97.71          | 94.14          |
| K_48h_3       | 47852690         | 7177903500        | 6758383972      | 0.00075      | 97.79          | 94.15          |
| K_120h_1      | 43226452         | 6483967800        | 6113049947      | 0.002017     | 97.74          | 94.27          |
| K_120h_2      | 47072796         | 7060919400        | 6654394249      | 0.00197      | 97.74          | 94.24          |
| K_120h_3      | 41473580         | 6221037000        | 5861696101      | 0.000752     | 97.83          | 94.22          |

L0 h~120 h, S0 h~120 h and K 0 h~120 h represented the samples of liver, spleen and head kidney at 0, 48, and 120 h post-injection of *Streptococcus agalactiae*, respectively.

**Table S2.** Data filtering statistics.

| <b>Sample</b> | <b>Clean Reads No.</b> | <b>Clean Data (bp)</b> | <b>Clean Reads %</b> | <b>Clean Data %</b> |
|---------------|------------------------|------------------------|----------------------|---------------------|
| L_0h_1        | 36764982               | 5514747300             | 92.66                | 92.66               |
| L_0h_2        | 38252016               | 5737802400             | 92.63                | 92.63               |
| L_0h_3        | 40154812               | 6023221800             | 93.52                | 93.52               |
| L_48h_1       | 38254420               | 5738163000             | 92.49                | 92.49               |
| L_48h_2       | 44733368               | 6710005200             | 92.36                | 92.36               |
| L_48h_3       | 49753466               | 7463019900             | 92.59                | 92.59               |
| L_120h_1      | 40072692               | 6010903800             | 92.03                | 92.03               |
| L_120h_2      | 43236278               | 6485441700             | 92.79                | 92.79               |
| L_120h_3      | 48831400               | 7324710000             | 92.5                 | 92.5                |
| S_0h_1        | 43909038               | 6586355700             | 92.08                | 92.08               |
| S_0h_2        | 42313106               | 6346965900             | 92.46                | 92.46               |
| S_0h_3        | 45266726               | 6790008900             | 93.5                 | 93.5                |
| S_48h_1       | 37719350               | 5657902500             | 91.81                | 91.81               |
| S_48h_2       | 42792586               | 6418887900             | 90.99                | 90.99               |
| S_48h_3       | 44273978               | 6641096700             | 93.43                | 93.43               |
| S_120h_1      | 35432678               | 5314901700             | 91.39                | 91.39               |
| S_120h_2      | 40217176               | 6032576400             | 90.92                | 90.92               |
| S_120h_3      | 41729568               | 6259435200             | 93.43                | 93.43               |
| K_0h_1        | 36873200               | 5530980000             | 91.62                | 91.62               |
| K_0h_2        | 40791116               | 6118667400             | 91.35                | 91.35               |
| K_0h_3        | 39570698               | 5935604700             | 93.21                | 93.21               |
| K_48h_1       | 37073164               | 5560974600             | 91.82                | 91.82               |
| K_48h_2       | 39396582               | 5909487300             | 91.06                | 91.06               |
| K_48h_3       | 44493376               | 6674006400             | 92.97                | 92.97               |
| K_120h_1      | 39505048               | 5925757200             | 91.39                | 91.39               |
| K_120h_2      | 43325542               | 6498831300             | 92.03                | 92.03               |
| K_120h_3      | 38727706               | 5809155900             | 93.37                | 93.37               |

L0h~120h, S0h~120h and K0h~120h represented the samples of liver, spleen and head kidney at 0, 48, and 120 h post-injection of *Streptococcus agalactiae*, respectively.
